# Supplementary material for: Long-Term Hematopoietic Engraftment of Congenic Amniotic Fluid Stem Cells After in Utero Intraperitoneal Transplantation to Immune Competent Mice
Source: PubMed Central journal article supplement (PMC5910037; doi:10.1089/scd.2017.0116), 2018-04-15
Supplement: Supp_Fig1.pdf [file Supp_Fig1.pdf]

## Supplementary Data

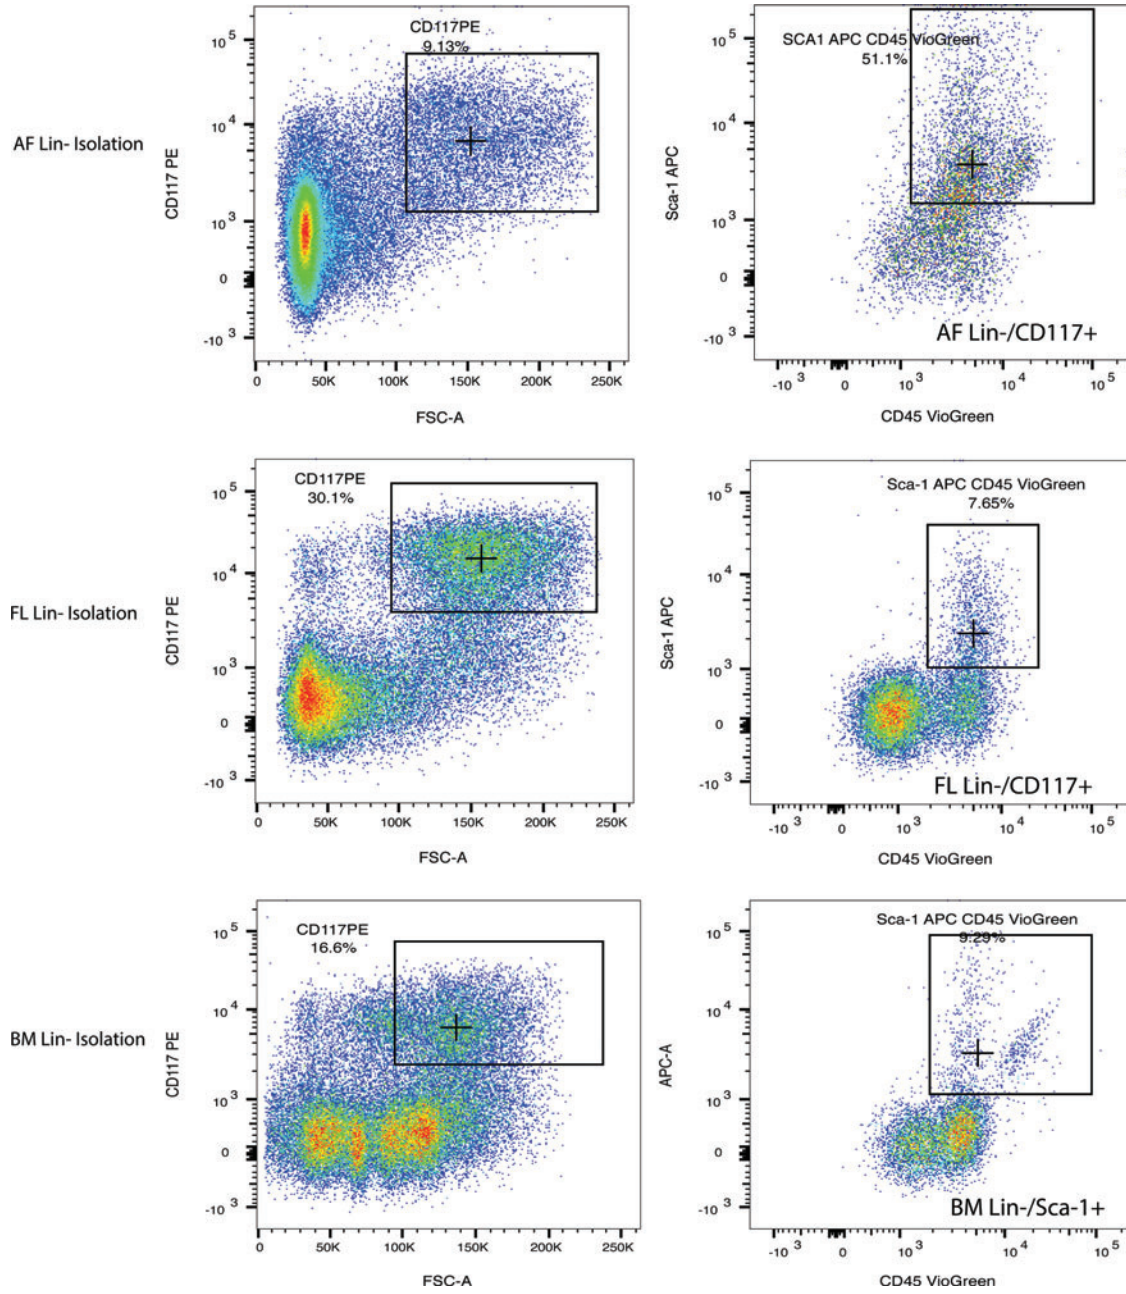

**SUPPLEMENTARY FIG. S1.** Flow cytometry analysis of the isolated cells from fetal liver, bone marrow and amniotic fluid showing co-expression of stem cell markers
